# Supplementary material for: Variability, timescales, and nonlinearity in climate responses to black carbon emissions
Source: Copernicus journal article supplement (doi:10.5194/acp-19-2405-2019), 2019-02-25
Supplement: Supplementary file 1 [file acp-19-2405-2019-supplement.zip]

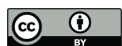

## *Supplement of*

# **Variability, timescales, and nonlinearity in climate responses to black carbon emissions**

**Yang Yang et al.**

*Correspondence to:* Yang Yang ([yang.yang@pnnl.gov](mailto:yang.yang@pnnl.gov)) and Steven J. Smith ([ssmith@pnnl.gov](mailto:ssmith@pnnl.gov))

- [acp-19-2405-2019-supplement-title-page.pdf](#)
- Initial\_Transient\_Fit\_CodeData
  - .DS\_Store
  - Arctic-Temp.csv
  - Fit\_Initial\_Transient.R
  - Mid-LatTemp.csv
- [Yang\\_Supplement.pdf](#)

The copyright of individual parts of the supplement might differ from the CC BY 4.0 License.
