# Supplementary material for: Variability, timescales, and nonlinearity in climate responses to black carbon emissions
Source: Copernicus journal article supplement (doi:10.5194/acp-19-2405-2019), 2019-02-25
Supplement: Supplementary file 2 [file acp-19-2405-2019-supplement.zip]

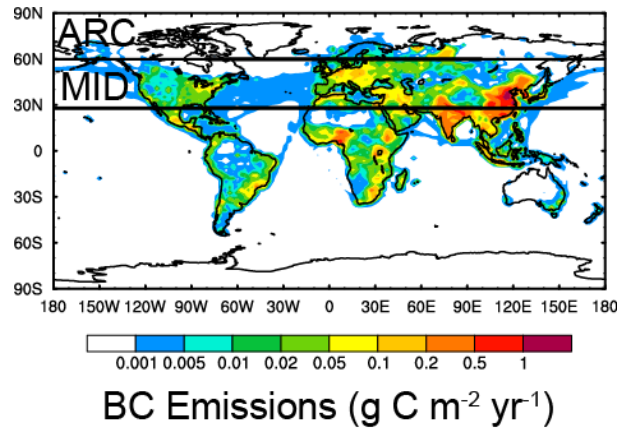

**Figure S1.** Spatial distribution of annual anthropogenic emissions ( $\text{g C m}^{-2} \text{ yr}^{-1}$ ) of black carbon (BC) averaged over 2008–2012. The geographical source regions for emission perturbations in this study are the Arctic (ARC; 60–90°N) and mid-latitudes (MID; 28–60°N).

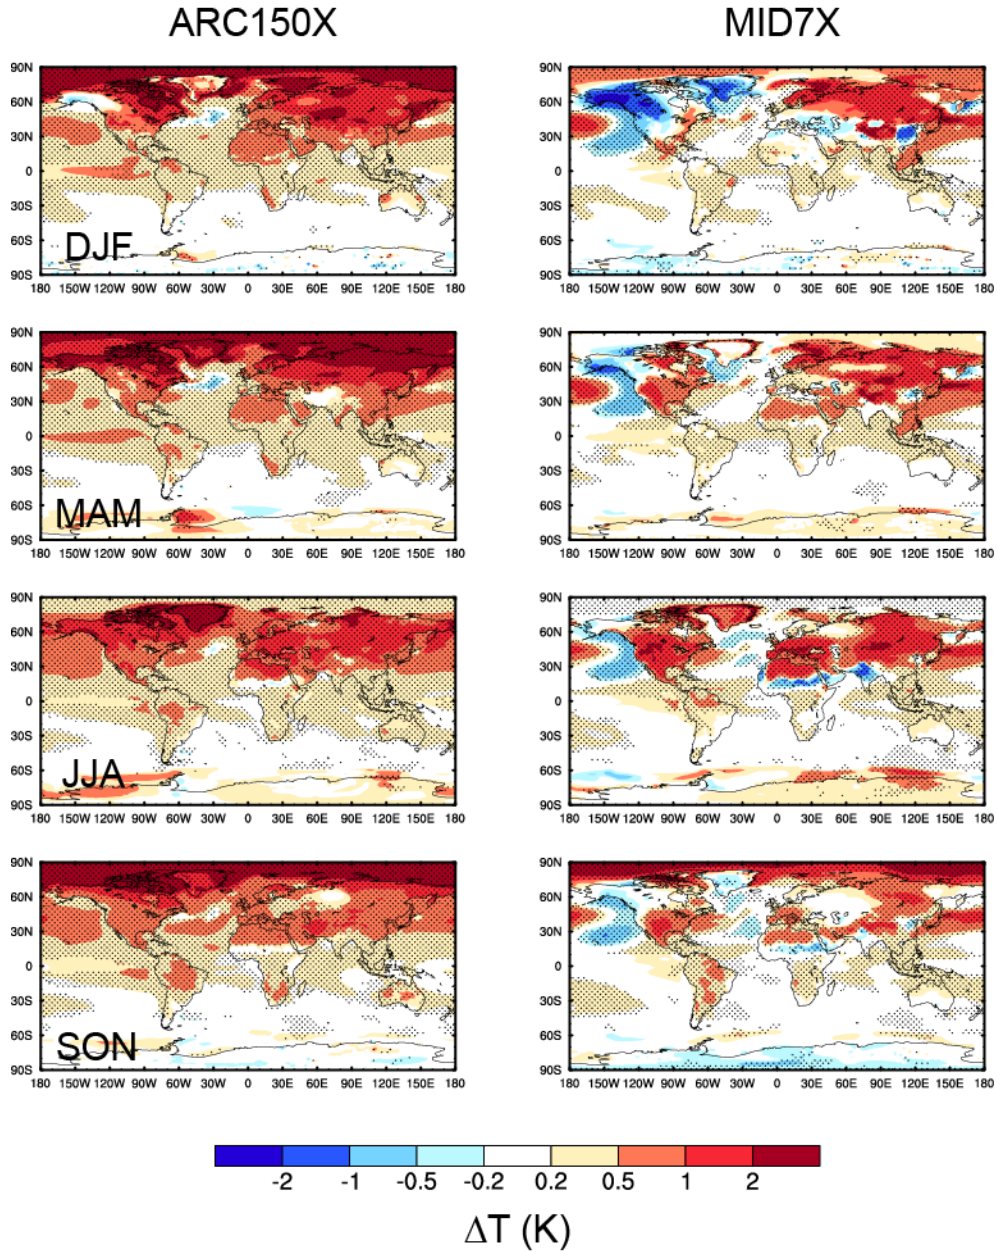

**Figure S2.** Spatial distribution of changes in December-January-February (DJF), March-April-May (MAM), June-July-August (JJA) and September-October-November (SON) (from top to bottom) mean surface air temperature (K) for ARC150X (left) and MID7X (right) compared to PD. The dotted areas indicate statistical significance with 95% confidence from a two-tailed Student's t test.

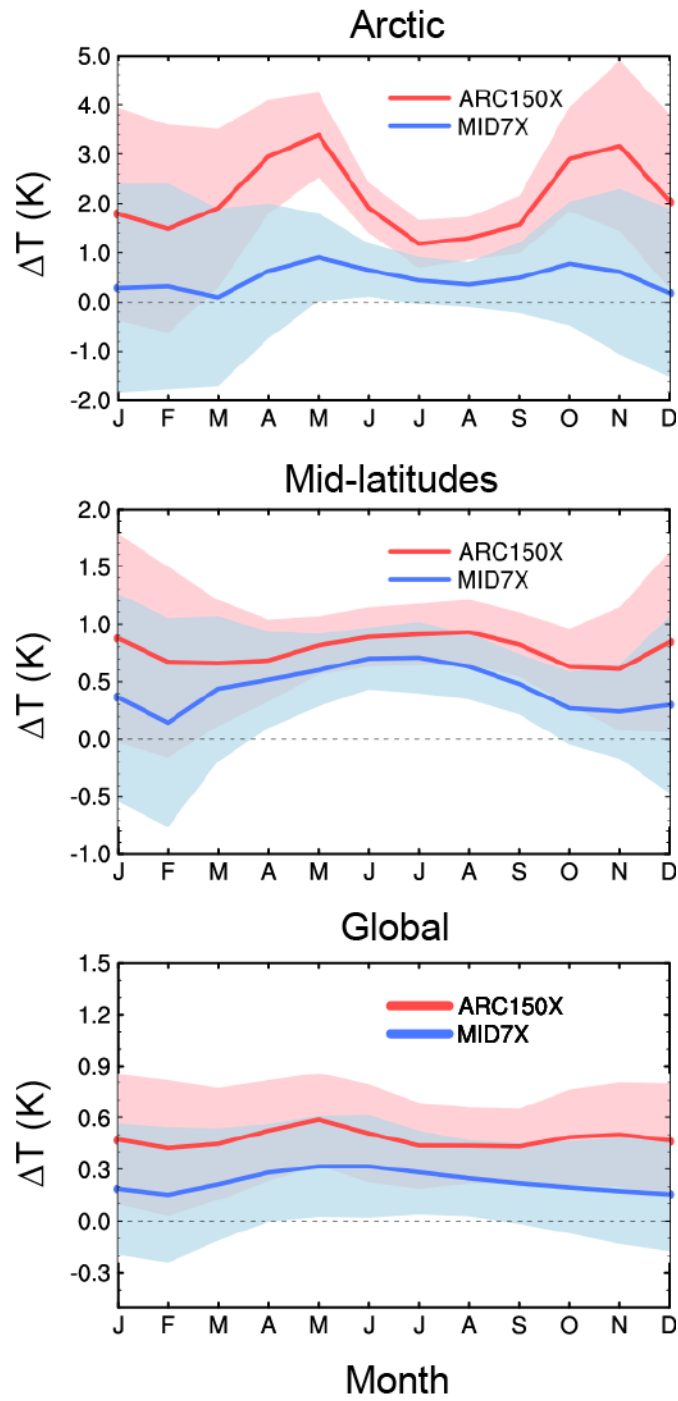

**Figure S3.** Changes in Arctic (top), mid-latitude (middle) and global (bottom) monthly mean surface temperature (K) for ARC150X/MID7X compared to PD.

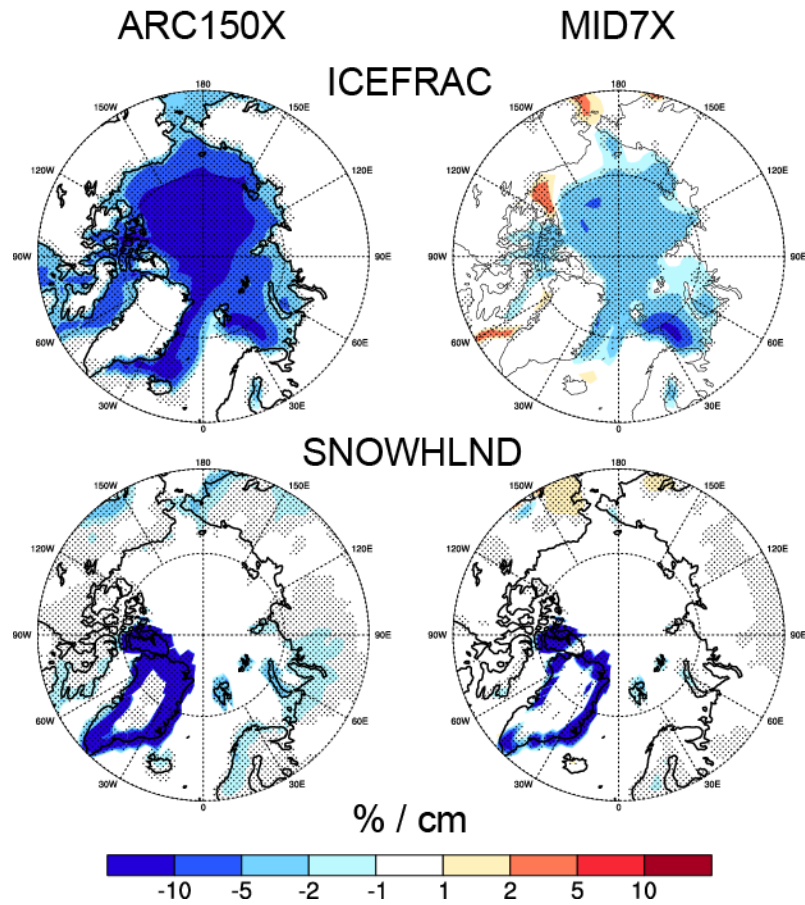

**Figure S4.** Changes in annual and zonal mean fraction of surface area covered by sea-ice (ICEFRAC, %, top) and water equivalent snow depth over land (SNOWHLND, cm, bottom) for ARC150X (left) and MID7X (right) compared to PD.

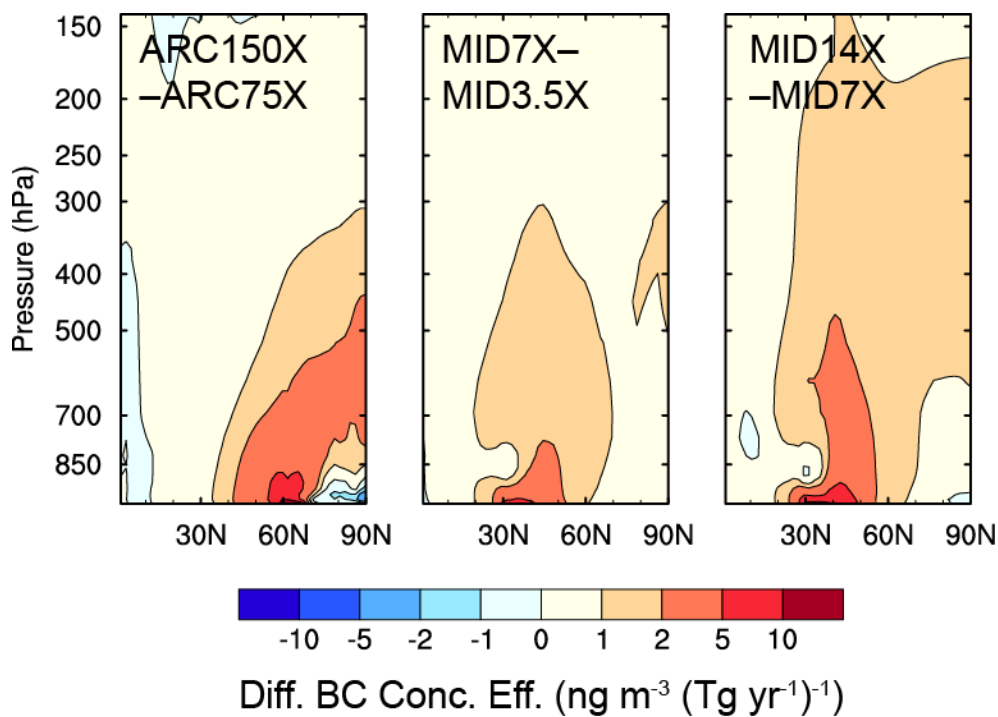

**Figure S5.** Differences in annual and zonal mean BC concentration efficiency (ng m<sup>-3</sup> (Tg yr<sup>-1</sup>)<sup>-1</sup>) between ARC150X and ARC75X (left), MID7X and MID3.5X (middle), and MID14X and MID7X (Right).

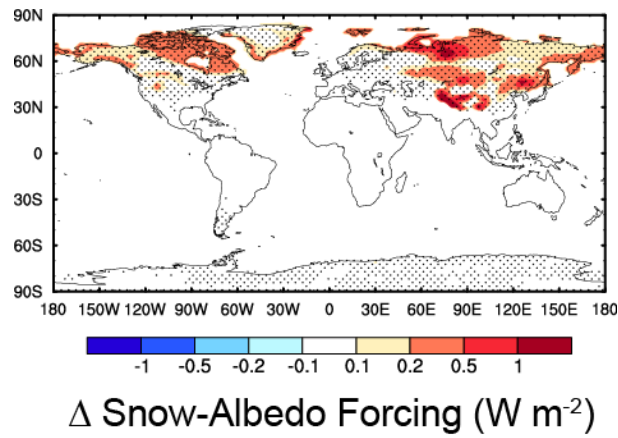

**Figure S6.** Spatial distribution of snow/ice-albedo forcing of BC ( $\text{W m}^{-2}$ ) between PD and PI.
